# Supplementary material for: 3-D vertical arrays of TiO2 nanotubes on Ti meshes: Efficient photoanodes for water photoelectrolysis
Source: Royal Society of Chemistry journal article supplement (doi:10.1039/c1jm11072a), 2011-01-01

## Electronic supplementary information (ESI)

Fig. S1. X-ray diffraction patterns of 3-D arrays of TiO<sub>2</sub> nanotubes with lengths of (a) 260 nm, (b) 1200 nm and (c) 2000 nm on Ti mesh.

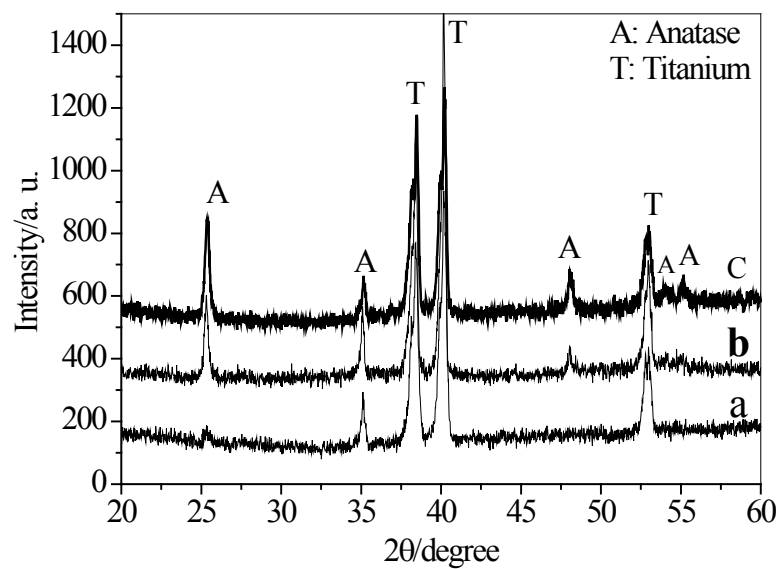

Fig. S2. (a) Top view and (b) cross-sectional images of 2-D arrays of TiO<sub>2</sub> nanotubes on Ti foil prepared by anodization of Ti foil in 0.5% HF solution for 20 min.

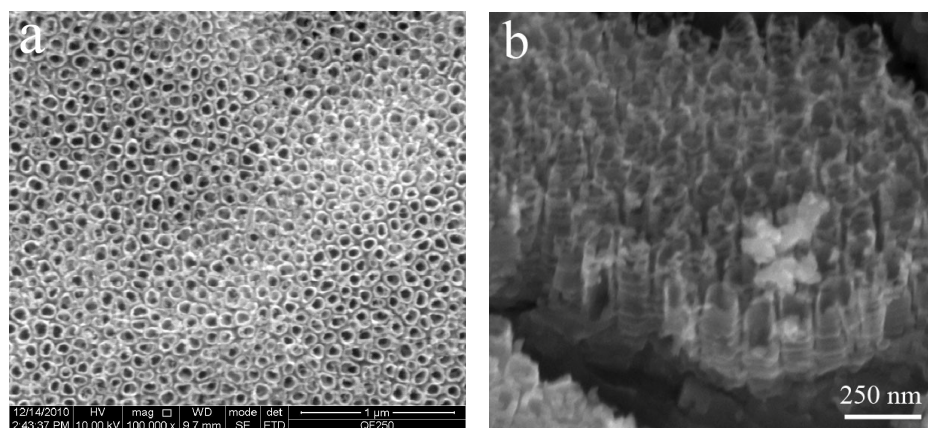

Fig. S3. Schematic diagrams of the photoanodes composed of 3-D and 2-D arrays of  $\text{TiO}_2$  nanotubes.

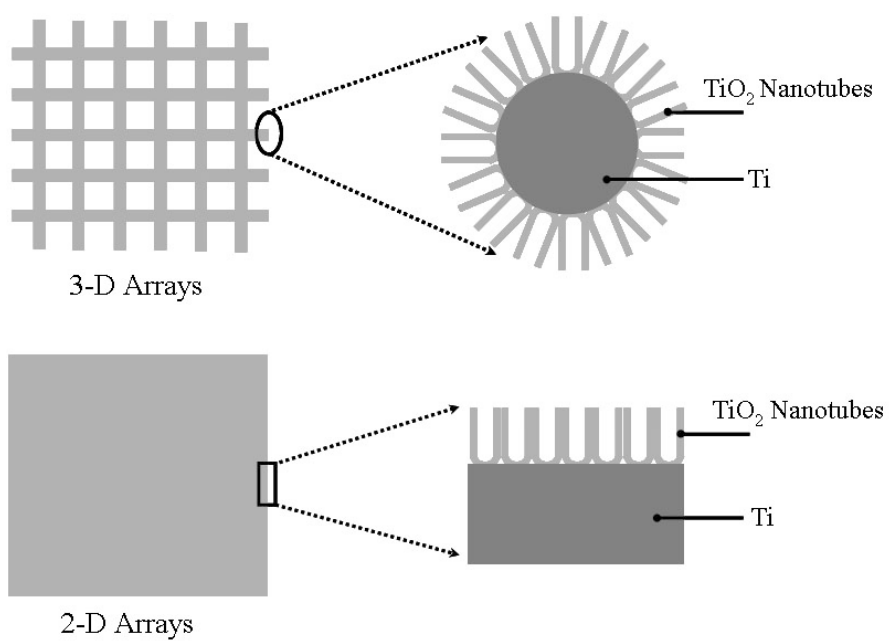

Fig. S4. (a) Top-view and (b, c) cross-sectional images of 3-D arrays of TiO<sub>2</sub> nanotubes on Ti mesh prepared by anodization in 0.25 wt % ammonium fluoride containing 2 vol % Milli-Q water in ethylene glycol for 10 min. Note that the surface of the sample were covered by a layer of porous TiO<sub>2</sub>. The sample prepared by anodization for 5 min demonstrated a similar structure except the length.

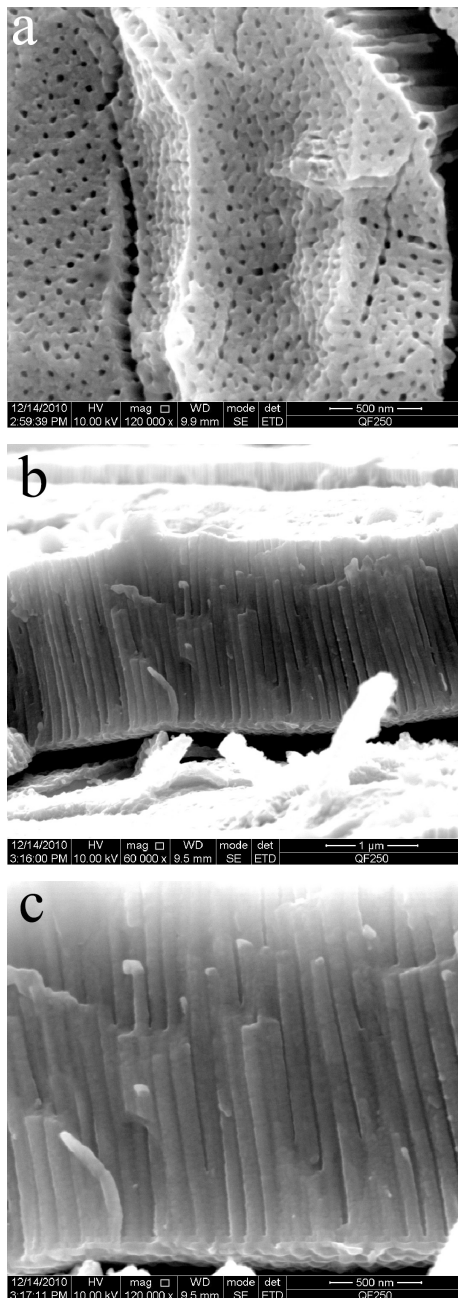

Fig. S5. Schematic diagrams (top-view images) of TiO<sub>2</sub> photoanode when rotated in an angle ( $\alpha$ ) of  $-90^\circ \sim +90^\circ$ . When the photoanode was normal to the incident light, the rotation angle was defined to be  $0^\circ$ . Positive and negative rotation angles were defined that the photoanode was rotated in a clockwise and counter-clockwise directions respectively.

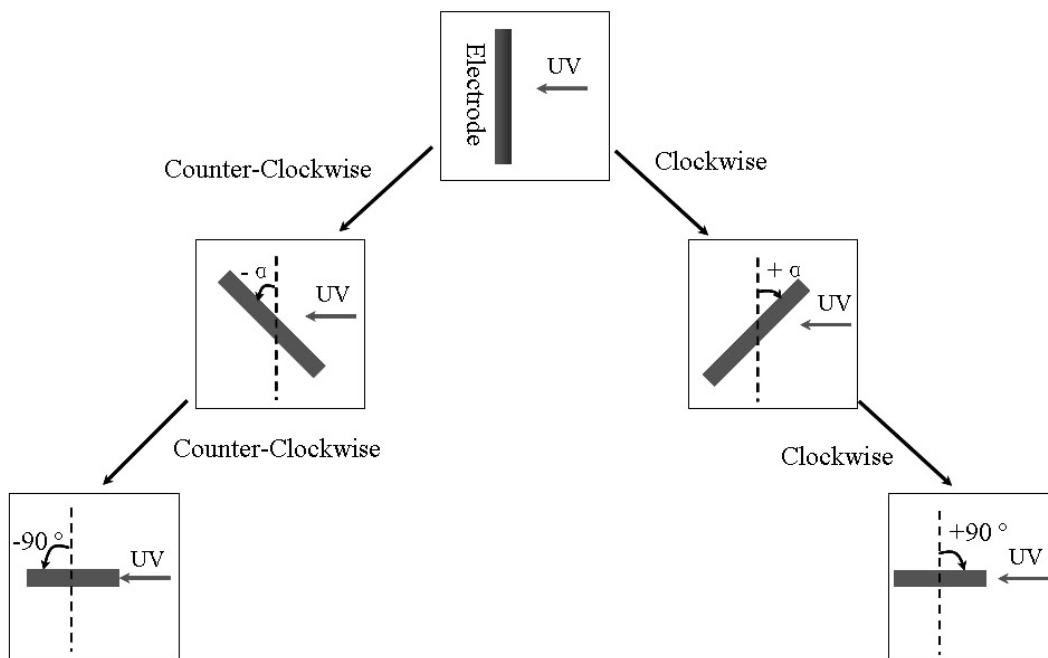

Fig. S6. Photocurrent density/potential curves of 2-D arrays of TiO<sub>2</sub> nanotubes with a length of 260 nm under rotation angle of 0 °, ±30 °, ±60 ° and ±90 °. Photocurrent density was measured under 10.5 mW/cm<sup>2</sup> UV irradiance.

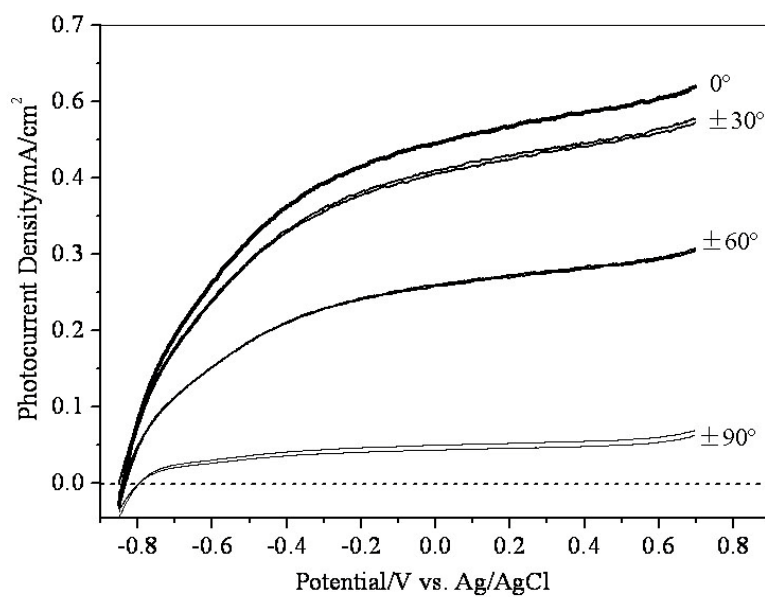

Fig. S7. Photocurrent density/potential curves of the 3-D arrays of TiO<sub>2</sub> nanotubes with a length of 260 nm in 1 M KOH electrolyte with (a) 5vol% and (b) 10vol% ethylene glycol additives under 10.5 mW/cm<sup>2</sup> UV irradiance.

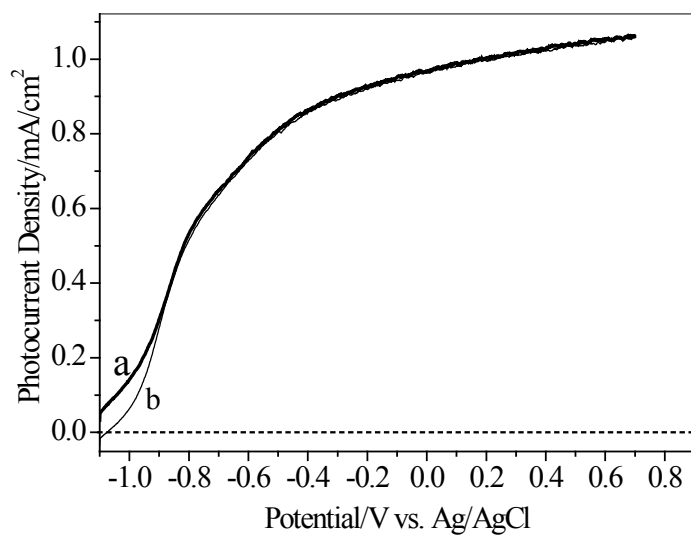

Supplement: c1jm11072a.pdf [file c1jm11072a.pdf]
